# Supplementary material for: Novel metastatic models of esophageal adenocarcinoma derived from FLO-1 cells highlight the importance of E-cadherin in cancer metastasis
Source: PubMed Central journal article supplement (PMC5347774; doi:10.18632/oncotarget.13391), 2016-11-16
Supplement: oncotarget-07-83342-s001.pdf [file oncotarget-07-83342-s001.pdf]

## Novel metastatic models of esophageal adenocarcinoma derived from FLO-1 cells highlight the importance of E-cadherin in cancer metastasis

### Supplementary Materials

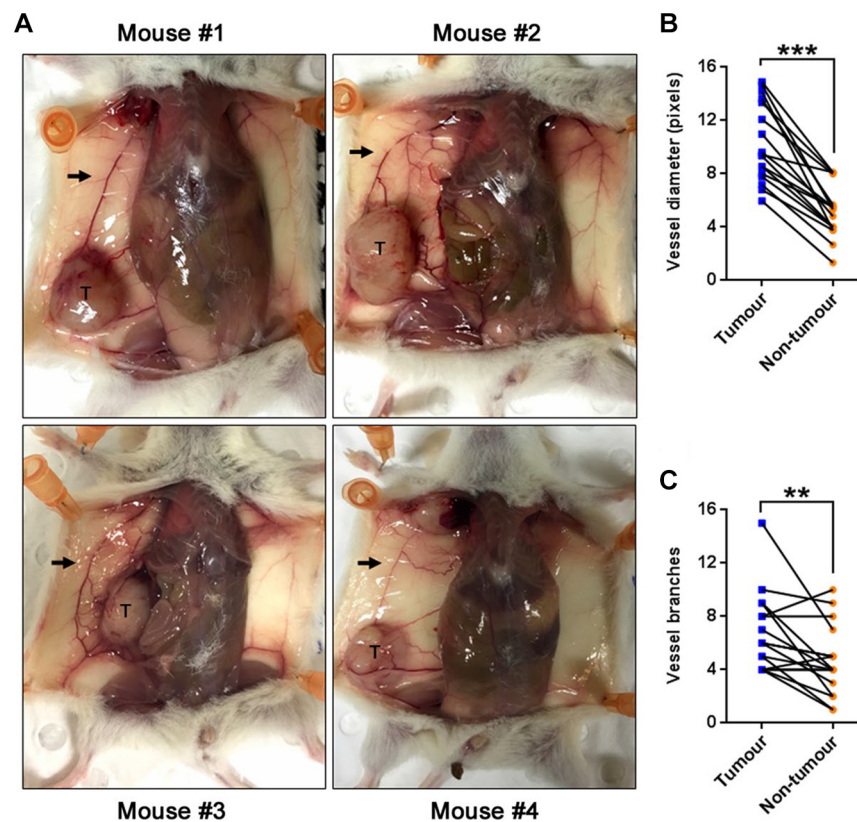

**Supplementary Figure S1: Related to Figure 1, FLO-1 spontaneously metastasizes in NOD-SCID IL-2R $\gamma$ <sup>KO</sup> (NSG) mice.** (A–C) Examples of 4 (Total 17) mice bearing subcutaneous FLO-1 xenografts (T). The mammary artery (arrow) on the ipsilateral side of the tumor was compared to its contralateral counterpart with respect to vessel diameter (B) and number of branching points (C). Vessel diameter was measured at the midpoint from the axilla to the groin. A branching point was considered when a smaller caliber vessel originated directly from the mammary artery.

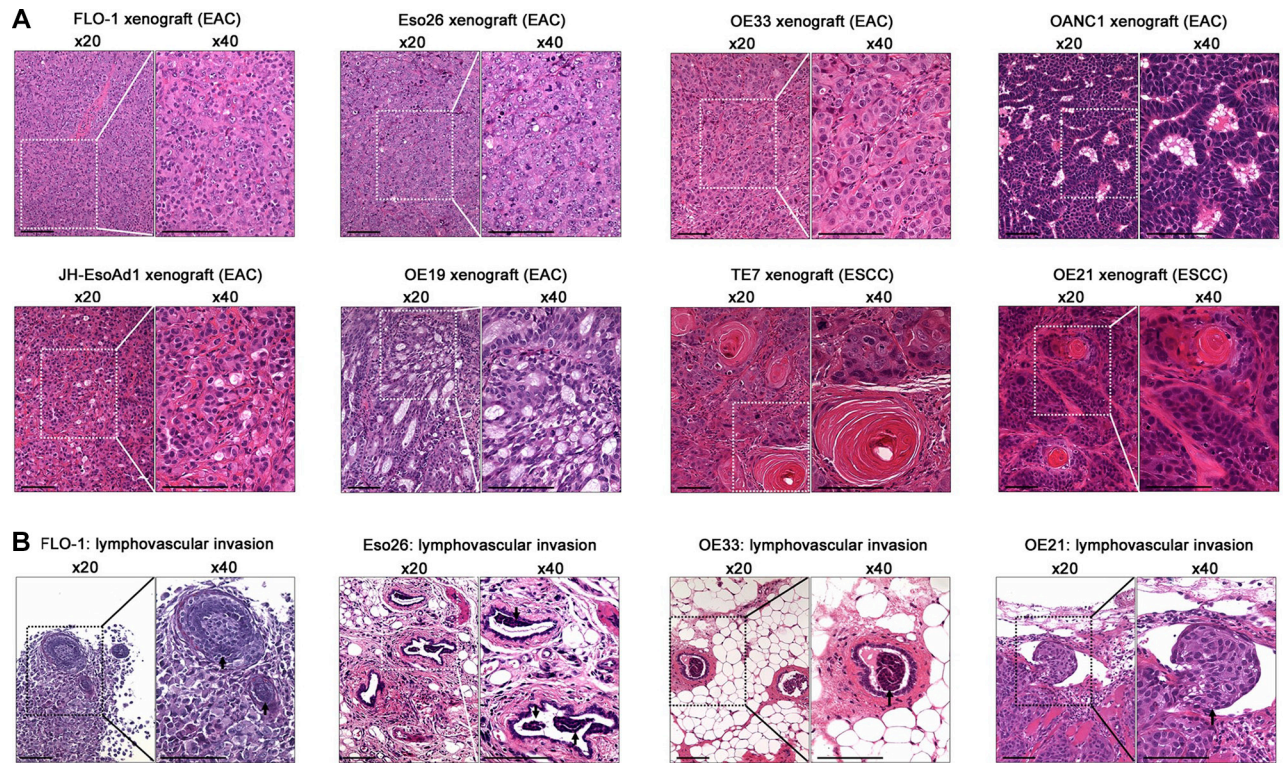

**Supplementary Figure S2: Related to Figure 2, FLO-1 exhibits a mesenchymal phenotype.** (A–B) H&E staining of all cell line xenografts demonstrating tumor differentiation (A) and lymphovascular invasion (B, arrows). Esophageal adenocarcinoma (EAC), esophageal squamous cell carcinoma (ESCC). Scale bar = 100  $\mu$ m.

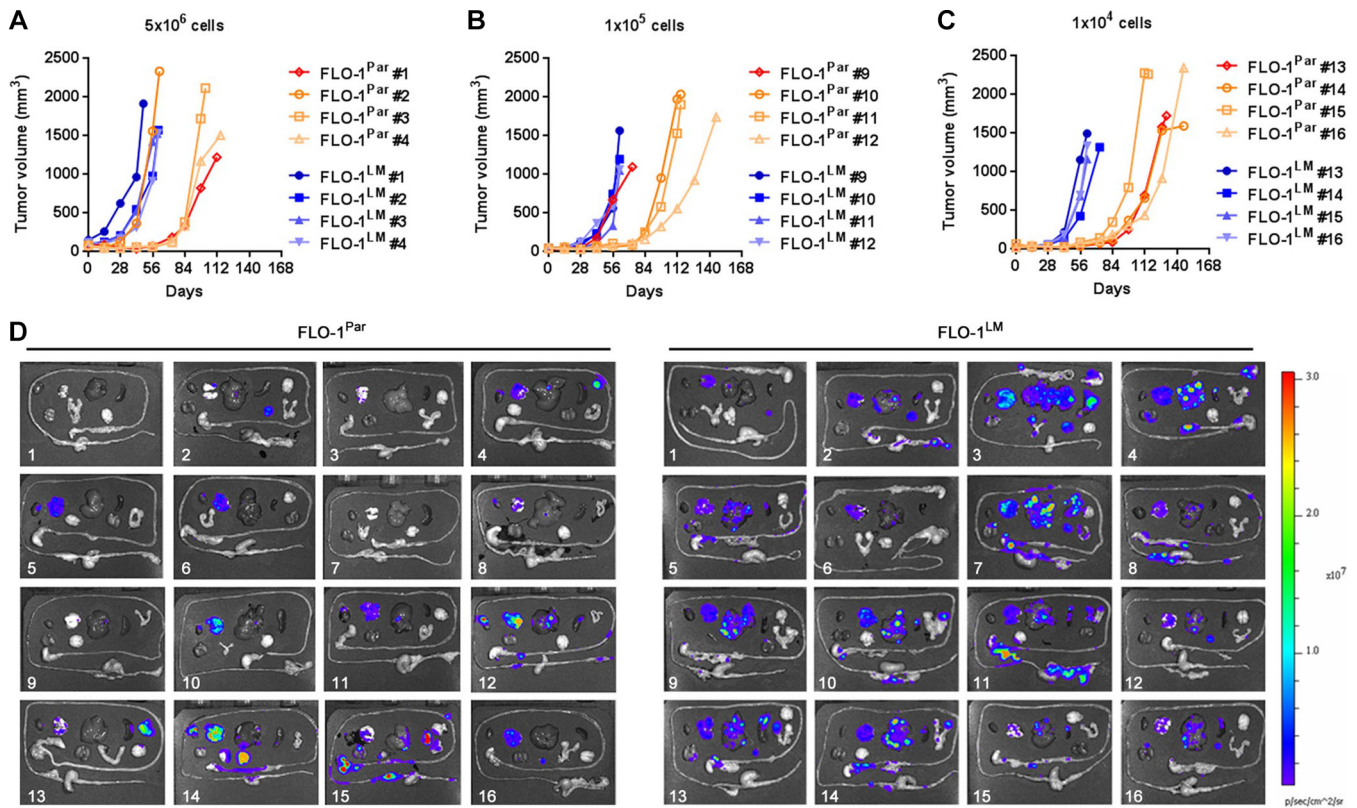

**Supplementary Figure S3: Related to Figure 4, FLO-1<sup>LM</sup> has increased proliferative and metastatic capacity *in vivo*.** (A–C) Growth curves of FLO-1<sup>Par</sup> and FLO-1<sup>LM</sup> xenografts following subcutaneous injection of 5 million (A), 100 thousand (B) and 10 thousand (C) cells into the flank of NSG mice. (D) Bioluminescent heatmaps of organs from all mice bearing either FLO-1<sup>Par</sup> and FLO-1<sup>LM</sup> xenografts.

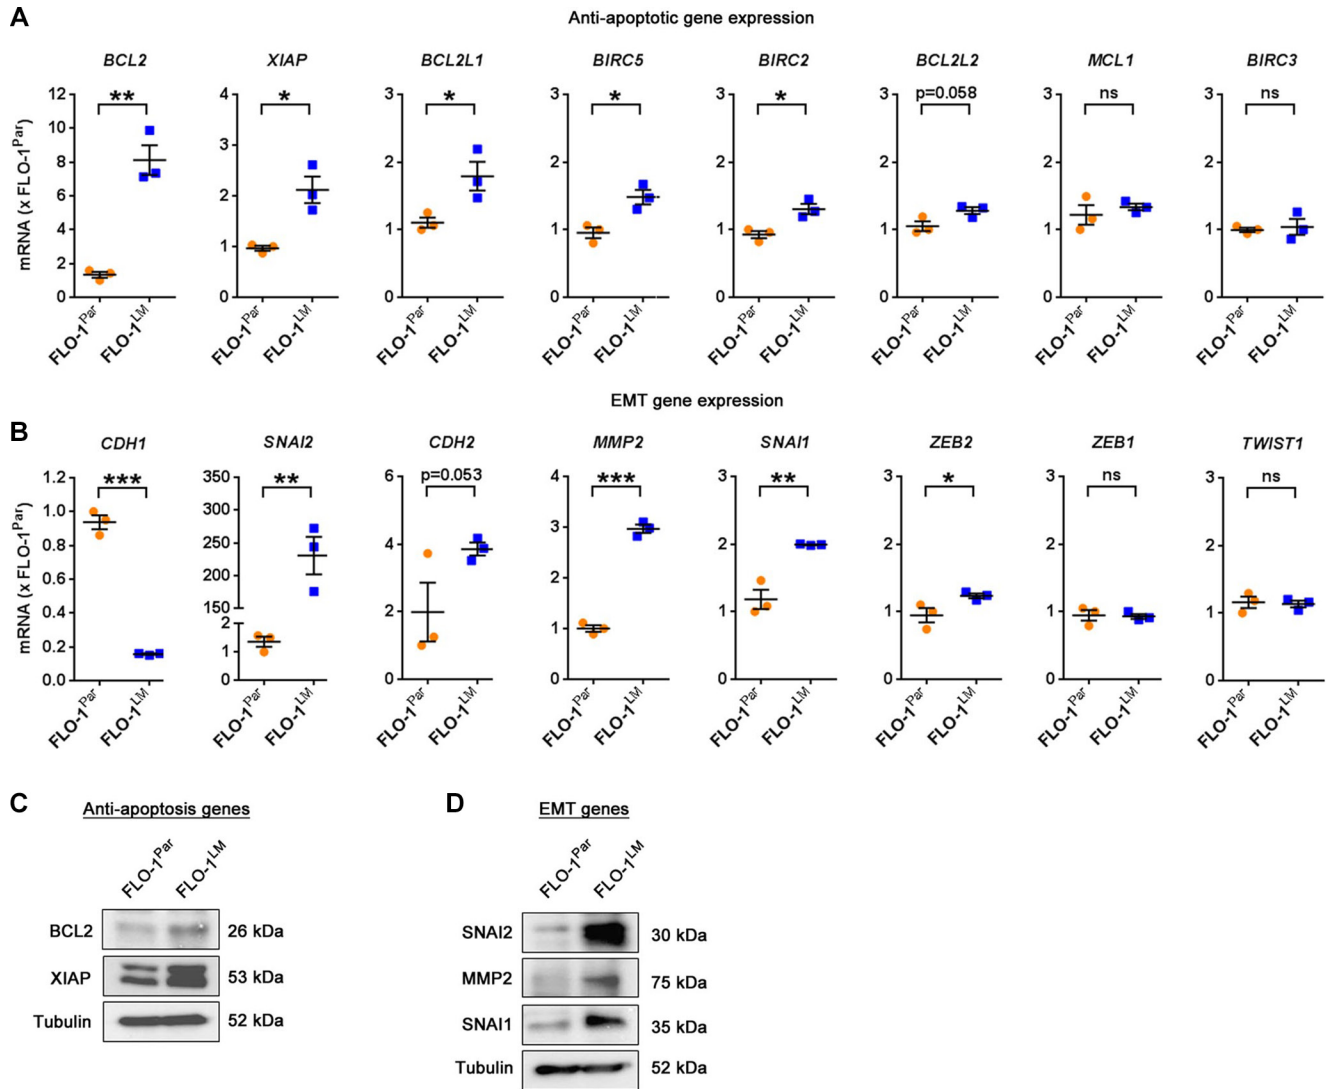

**Supplementary Figure S4: Related to Figure 5, FLO-1<sup>LM</sup> highlights molecular pathways that are deranged in metastasis.** (A–B) qRT-PCR of anti-apoptotic (A) and EMT (B) genes expressed in FLO-1<sup>LM</sup> compared with FLO-1<sup>Par</sup> cells. (C–D) Western blots of anti-apoptotic (C) and EMT (D) genes expressed in FLO-1<sup>LM</sup> compared with FLO-1<sup>Par</sup> cells. Unpaired *t*-test. Error bars = SEM, *n* = 3 for A and B, *n* = 2 for C and D, \**p* < 0.05, \*\**p* < 0.01, \*\*\**p* < 0.001, ns = non-significant.

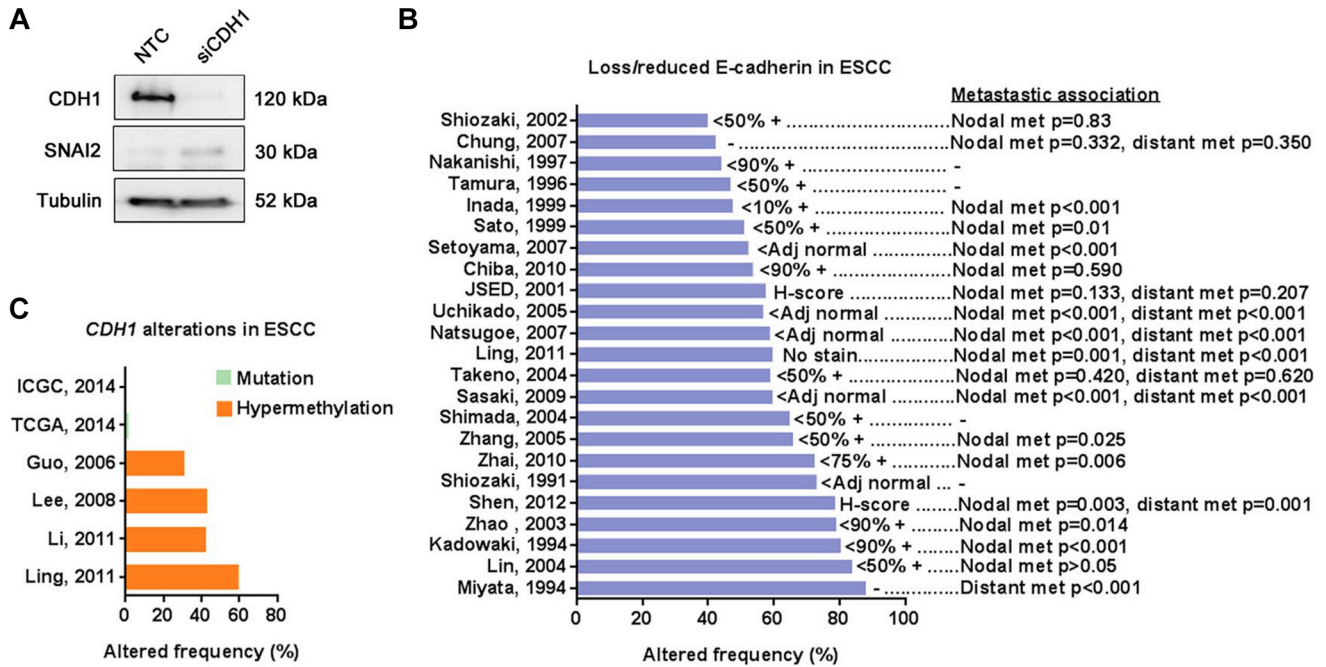

**Supplementary Figure S5: Related to Figure 6, Low E-cadherin expression is associated with increased metastasis in FLO-1 and reduced patient survival.** (A) Western blot of SNAI2 at 72 hr post transfection with *CDH1* and non-targeting control (NTC) siRNA. (B) Frequency of lost/reduced E-cadherin expression in esophageal squamous cell carcinoma (ESCC) from published studies, and its association with lymph node and distant organ metastasis. (-) Not reported. The annotations immediately adjacent to each bar indicates the study's definition of loss/reduced E-cadherin expression. (C) Frequency of *CDH1* genetic alterations in ESCC in TCGA and ICGC datasets as well as from published studies.  $n = 2$  for A.

**Supplementary Table S1: STR analysis of FLO-1 parental and FLO-1<sup>LM</sup> cell lines**

| Marker  | FLO-1 parental |                | FLO-1LM  |                |
|---------|----------------|----------------|----------|----------------|
|         | Genotype       | Peak sizes     | Genotype | Peak sizes     |
| AMEL    | X              | 104.1          | X        | 103.96         |
| CSF1PO  | 11             | 337.56         | 11       | 337.39         |
| D13S317 | 11             | 187.98         | 11       | 187.62         |
| D16S539 | 12, 13         | 290.9, 294.82  | 12, 13   | 290.72, 294.73 |
| D18S51  | 14, 16         | 306.34, 313.81 | 14, 16   | 306.43, 313.84 |
| D21S11  | 30, 32.2       | 223.42, 233.26 | 30, 32.2 | 223.21, 233.17 |
| D3S1358 | 15             | 124.32         | 15       | 124.15         |
| D5S818  | 12, 14         | 134.75, 143.05 | 12, 14   | 134.58, 142.73 |
| D7S820  | 8              | 220.36         | 8        | 220.11         |
| D8S1179 | 13             | 226.33         | 13       | 226.14         |
| FGA     | 21             | 341.43         | 21       | 341.31         |
| Penta D | 11, 12         | 408.16, 412.75 | 11, 12   | 408.16, 413.02 |
| Penta E | 5, 17          | 377.29, 438.89 | 5, 17    | 377.16, 438.83 |
| TH01    | 6              | 161.98         | 6        | 161.66         |
| TPOX    | 9, 11          | 272.92, 280.83 | 9, 11    | 272.89, 280.94 |
| vWA     | 16             | 146.26         | 16       | 146.14         |

**Supplementary Table S2: Significantly (FDR < 0.05) downregulated genes in FLO-1<sup>LM</sup> compared with FLO-1<sup>Par</sup>.** See Supplementary\_Table\_S2.

**Supplementary Table S3: Significantly (FDR < 0.05) upregulated genes in FLO-1<sup>LM</sup> compared with FLO-1<sup>Par</sup>.** See Supplementary\_Table\_S3.

**Supplementary Table S4: Enrichment analysis report: Top 200 GO processes for FLO-1<sup>LM</sup> vs. FLO-1<sup>Par</sup>.** See Supplementary\_Table\_S4.

**Supplementary Table S5: Differentially (FDR < 0.05) expressed genes in *CDH1* low vs. high tumors in GSE19417.** See Supplementary\_Table\_S5.

**Supplementary Table S6: Overlapping GO processes enriched in FLO-1<sup>LM</sup> and *CDH1* low tumors.** See Supplementary\_Table\_S6.

**Supplementary Table S7: Patient demographics, tumor characteristics and survival (GSE19417 dataset)**

|                               | Overall<br>(n = 64) | CDH1 High<br>(n = 48) | CDH1 Low<br>(n = 16) | OR/<br>HR    | 95% CI             | P value      |
|-------------------------------|---------------------|-----------------------|----------------------|--------------|--------------------|--------------|
| <b>Patient demographics</b>   |                     |                       |                      |              |                    |              |
| Gender, male (%)              | 46 (71.9)           | 36 (75.0)             | 10 (63.0)            | 0.55         | 0.17–1.85          | 0.34         |
| <b>Tumour characteristics</b> |                     |                       |                      |              |                    |              |
| Location                      |                     |                       |                      |              |                    |              |
| Esophagus, n (%)              | 48 (75.0)           | 36 (75.0)             | 12 (75.0)            | 1.00         | 0.27–3.69          | 1.00         |
| GEJ, n (%)                    | 16 (25.0)           | 12 (25.0)             | 4 (25.0)             |              |                    |              |
| Differentiation               |                     |                       |                      |              |                    |              |
| Poor, n (%)                   | 31 (48.4)           | 23 (47.9)             | 8 (50.0)             | 1.74         | 0.18–17.22         | 1.00         |
| Moderate, n (%)               | 27 (42.2)           | 20 (41.7)             | 7 (43.8)             | 1.75         | 0.17–17.69         | 1.00         |
| Well, n (%)                   | 6 (9.4)             | 5 (10.4)              | 1 (6.3)              |              |                    |              |
| Nodal status                  |                     |                       |                      |              |                    |              |
| Positive, n (%)               | 48 (75.0)           | 36 (75.0)             | 12 (75.0)            | 1.00         | 0.27–3.69          | 1.00         |
| n positive, median (IQR)      | 5 (2–8)             | 4.5 (2.0–8.0)         | 5.0 (1.8–8.0)        | –            | –                  | 0.96         |
| <b>Outcome</b>                |                     |                       |                      |              |                    |              |
| OS, months, median (IQR)      | 18.8 (13.6–34.5)    | 25.9 (15.8–44.2)      | 6.5 (5.5–51.1)       | <b>2.08*</b> | <b>1.05 – 4.11</b> | <b>0.035</b> |

Totals may not equal 100% due to rounding. Odds ratio (OR), hazard ratio (HR), confidence interval (CI), inter-quartile range (IQR), gastro-esophageal junction (GEJ), overall survival (OS). *CDH1* high and Low groups were compared using the Log-rank test for OS and Chi-square test for all other variables. \*The HR presented is from a multivariable Cox regression model adjusting for sex, location, differentiation and nodal status (positive vs. negative).

**Supplementary Table S8: RT-PCR primer sequences**

| Gene          | Forward (5'-3')         | Reverse (5'-3')         |
|---------------|-------------------------|-------------------------|
| <i>CDH1</i>   | TGCCACCCTGGCTTTGACGC    | ATTCACTCTGCCCAGGACGCGG  |
| <i>CDH2</i>   | ATCGCATTATGCAAGACTGGATT | ATGCACATCCTTCGATAAGACTG |
| <i>SNAI1</i>  | TCGGAAGCCTAACTACAGCGA   | AGATGAGCATTGGCAGCGAG    |
| <i>SNAI2</i>  | AAGCATTTCAACGCCTCCAAA   | GGATCTCTGGTTGTGGTATGACA |
| <i>ZEB1</i>   | GATGATGAATGCGAGTCAGATGC | ACAGCAGTGTCTTGTGTGTGT   |
| <i>ZEB2</i>   | CAAGAGGCGCAAACAAGCC     | GGTTGGCAATACCGTCATCC    |
| <i>MMP2</i>   | TACAGGATCATTGGCTACACACC | GGTCACATCGCTCCAGACT     |
| <i>TWIST1</i> | GTCCGCAGTCTTACGAGGAG    | GCTTGAGGGTCTGAATCTTGCT  |
| <i>BCL2</i>   | ATGTGTGTGGAGAGCGTCAA    | TCATCCACAGGGCGATGTT     |
| <i>BCL2L1</i> | TGGAGTCAGTTTAGTGATGTGGA | CCAGGATGGGTTGCCATTG     |
| <i>BCL2L2</i> | GACAAGTGCAGGAGTGGATG    | AAGGCCCTACAGTTACCAG     |
| <i>BIRC2</i>  | GTCAAATGCTTCTGTTGTGGC   | ACAAGCTACTATGTTCCAAGGTG |
| <i>BIRC3</i>  | TCCACACACTCATTACTTCCG   | TGGCCATGTCTGAAAAGTAAGT  |
| <i>BIRC4</i>  | TGAGAACTGGGCAGGTTGTA    | CTCTTGGGGTTAGGTGAGCA    |
| <i>BIRC5</i>  | ACATTCAAGAAGTGGCCCTTC   | AAGTCTGGCTCGTTCTCAGT    |
| <i>MCL1</i>   | GTAAGGAGTCGGGGTCTTCC    | CCCCACAGTAGAGGTTGAGT    |
| <i>GAPDH</i>  | GGTGTGAACCATGAG         | CCAGCAGTTTCCCGGA        |

**Supplementary Table S9: Antibodies for western blotting**

| <b>Antibody</b>                      | <b>Origin</b> | <b>Clone</b>  | <b>Source</b>                |
|--------------------------------------|---------------|---------------|------------------------------|
| <b>Anti-E-cadherin</b>               | Rabbit        | EP700Y        | Abcam                        |
| <b>Anti-N-cadherin</b>               | Mouse         | 32/N-Cadherin | BD Transduction Laboratories |
| <b>Anti-Vimentin</b>                 | Rabbit        | R28           | Cell Signaling Technology    |
| <b>Anti-Snail</b>                    | Rabbit        | C15D3         | Cell Signaling Technology    |
| <b>Anti-Slug</b>                     | Rabbit        | C19G7         | Cell Signaling Technology    |
| <b>Anti-Zeb1</b>                     | Rabbit        | D80D3         | Cell Signaling Technology    |
| <b>Anti-MMP2</b>                     | Mouse         | 2C1-1D12      | ThermoFisher Scientific      |
| <b>Anti-Bcl2</b>                     | Rabbit        | 50E3          | Cell Signaling Technology    |
| <b>Anti-XIAP</b>                     | Mouse         | 610763        | BD Transduction Laboratory   |
| <b>Anti-<math>\beta</math>-actin</b> | Mouse         | C4            | MP-Biomedical                |
| <b>Anti-GAPDH</b>                    | Mouse         | 6C5           | Abcam                        |
| <b>Anti-Tubulin</b>                  | Mouse         | B-5-1-2       | Sigma-Aldrich                |
| <b>Swine anti-rabbit</b>             | Swine         | P0217         | Dako                         |
| <b>Goat anti-mouse</b>               | Goat          | P0447         | Dako                         |

**Supplementary Table S10: Human and mouse vimentin qPCR and probe sequences**

| <b>Gene</b>      | <b>qPCR primers</b>                                                                                                               | <b>Probes</b>                 |
|------------------|-----------------------------------------------------------------------------------------------------------------------------------|-------------------------------|
| <b>hVimentin</b> | Forward (5'-3'): AGAGA A C T T T G C C G T T G A A G C T<br>Reverse (5'-3'"): G A A G G T G A C G A G C C A T T T C C             | CCTGCAGGATGAGATTCAGAATATGG    |
| <b>mVimentin</b> | Forward (5'-3'): C G A A G G T G A C G A G C C A T C T C<br>Reverse (5'-3'"): A G C T G C T A A C T A C C A G G A C A C T A T T G | CCTTCATGTTTTGGATCTCATCCTGCAGG |
